# Supplementary material for: A combined experimental and DFT investigation on the structure and CO-releasing properties of mono and binuclear fac-ReI(CO)3complexes with 5-pyridin-2-ylmethylene-amino uracils
Source: Royal Society of Chemistry journal article supplement (doi:10.1039/c6dt02208a), 2016-01-01
Supplement: c6dt02208a1.pdf [file c6dt02208a1.pdf]

**ESI**

**A combined experimental and DFT investigation on the structure and CO-releasing properties of mono and binuclear *fac*-Re<sup>I</sup>(CO)<sub>3</sub> complexes with 5-pyridin-2-ylmethylene-amino uracilst†**

Sonia B. Jiménez-Pulido,<sup>a</sup> Nuria A. Illán-Cabeza,<sup>a</sup> Francisco Hueso-Ureña,<sup>a</sup> Carmen R. Maldonado,<sup>b</sup> Purificación Sánchez-Sánchez,<sup>b</sup> M. Paz Fernández-Liencre,<sup>c</sup> Manuel Fernández-Gómez,<sup>c</sup> and Miguel N. Moreno-Carretero\*<sup>a</sup>

---

<sup>a</sup>*Dpt. Inorg. & Org. Chem., Campus Las Lagunillas (B3), University of Jaén, 23071-Jaén, Spain.*

<sup>b</sup>*Dpt. Inorg. Chem., Campus Fuentenueva, University of Granada, 18071-Granada, Spain.*

<sup>c</sup>*Dpt. Phys. & Anal. Chem., Campus Las Lagunillas (B3), University of Jaén, 23071-Jaén, Spain.*

## CONTENTS

- ✓ Analytical data
- ✓ Selected IR data
- ✓ NMR data
- ✓ MS and ESI-MS data
- ✓ Table S1. Mulliken charges for the atoms of the coordination sphere in complexes **6b**, **4b** and **1a**.

## Analytical data

### DAAUPic (yellow)

Calc. for  $C_{12}H_{13}N_5O_2$  (259.27): C, 55.59; H, 5.05; N, 27.01%.

Found: C, 55.36; H, 5.14; N, 27.56%.

### FDUHzPic · H<sub>2</sub>O (yellow)

Calc. for  $C_{13}H_{16}N_6O_3$  (304.31): C, 51.31; H, 5.30; N, 27.62%.

Found: C, 51.27; H, 5.20; N, 27.66%.

### [ReCl(CO)<sub>3</sub>(DAAUPic)] · ½C<sub>7</sub>H<sub>8</sub> (1a)

Calc. for  $C_{18.5}H_{17}ClN_5O_5Re$  (611.03): C, 36.37; H, 2.80; N, 11.46%;

found: C, 35.98; H, 2.68; N, 11.10%.

### [ReCl(CO)<sub>3</sub>(FDUHzPic)] · 2H<sub>2</sub>O (1b)

Calc. for  $C_{16}H_{18}ClN_6O_7Re$  (628.01): C, 30.60; H, 2.89; N, 13.38%;

found: C, 30.90; H, 2.35; N, 13.49%.

### [Re(CO)<sub>3</sub>(DAAUPic)(CH<sub>3</sub>CN)]ClO<sub>4</sub> · 2H<sub>2</sub>O (2a)

Calc. for  $C_{17}H_{20}ClN_6O_{11}Re$  (706.04): C, 28.92; H, 2.86; N, 11.90%;

found: C, 28.56; H, 2.48; N, 11.50%.

### [Re(CO)<sub>3</sub>(FDUHzPic)(CH<sub>3</sub>CN)]ClO<sub>4</sub> · 4H<sub>2</sub>O (2b)

Calc. for  $C_{18}H_{25}ClN_7O_{13}Re$  (769.09): C, 28.11; H, 3.28; N, 12.75%;

found: C, 27.95; H, 3.06; N, 12.46%.

### [Re(DAAUPic)(CO)<sub>3</sub>py]ClO<sub>4</sub> (3a)

Calc. for  $C_{20}H_{18}ClN_6O_9Re$  (708.06): C, 33.93; H, 2.56; N, 11.87%;

found: C, 34.15; H, 2.70; N, 11.45%.

### [Re(FDUHzPic)(CO)<sub>3</sub>py]ClO<sub>4</sub> (3b)

Calc. for  $C_{21}H_{19}ClN_7O_9Re$  (735.08): C, 34.31; H, 2.61; N, 13.34%;

found: C, 34.13; H, 2.60; N, 13.52%.

### [Re(CO)<sub>3</sub>(DAAUPic)py]PF<sub>6</sub> · 2H<sub>2</sub>O (4a)

Calc. for  $C_{20}H_{22}PF_6N_6O_7Re$  (789.59): C, 30.42; H, 2.81; N, 10.64%;

found: C, 30.49; H, 2.47; N, 10.51%.

### [Re(CO)<sub>3</sub>(FDUHzPic)py]PF<sub>6</sub> (4b)

Calc. for  $C_{21}H_{19}F_6N_7O_5PRe$  (780.59): C, 32.31; H, 2.45; N, 12.56%;

found: C, 32.01; H, 2.67; N, 12.54%.

### [Re<sub>2</sub>Cl<sub>2</sub>(CO)<sub>6</sub>(FDUHzPic)] (5b)

Calc. for  $C_{19}H_{14}Cl_2N_6O_8Re_2$  (897.67): C, 25.42; H, 1.57; N, 9.36%;

found: C, 25.55; H, 1.64; N, 9.43%.

### [Re<sub>2</sub>(CO)<sub>6</sub>(FDUHzPic)(CH<sub>3</sub>CN)<sub>2</sub>](ClO<sub>4</sub>)<sub>2</sub> · 2H<sub>2</sub>O (7b)

Calc. for  $C_{23}H_{24}Cl_2N_8O_{18}Re_2$  (1143.81): C, 24.15; H, 2.11; N, 9.80%;

found: C, 24.62; H, 2.10; N, 9.21%.

**Selected IR data (KBr, cm<sup>-1</sup>)**

· **DAAUPic**

3399 (m), 3246 (w), 3089 (m), 1688 (s), 1625 (m), 1597 (s), 1542 (m), 1511 (s), 1452 (m), 1429 (s), 1378 (m), 1288 (w), 1057 (m), 997 (m), 759 (m), 750 (m).

· **FDUHzPic·H<sub>2</sub>O**

3316 (s), 3075 (s), 2948 (m), 1700 (s), 1645 (s), 1617 (s), 1595 (s), 1540 (s), 1452 (s), 1384 (m), 1297 (m), 1178 (m), 1032 (m), 768 (m), 752 (m).

· **[ReCl(CO)<sub>3</sub>(DAAUPic)]·½C<sub>7</sub>H<sub>8</sub> (1a)**

3369 (m), 3206 (m), 3077 (w), 2024 (s), 1902 (s), 1693 (s), 1645 (s), 1625 (s), 1586 (s), 1542 (m), 1506 (s), 1456 (m), 1429 (m), 1382 (m), 1230 (m), 1064 (m), 776 (m), 762 (m).

· **[ReCl(CO)<sub>3</sub>(FDUHzPic)]·2H<sub>2</sub>O (1b)**

3455 (m), 3318 (m), 2028 (s), 1979 (m), 1911 (s), 1709 (s), 1650 (s), 1625 (s), 1543 (s), 1451 (s), 1384 (m), 1275 (w), 770 (w).

· **[Re(CO)<sub>3</sub>(DAAUPic)(CH<sub>3</sub>CN)]ClO<sub>4</sub>·2H<sub>2</sub>O (2a)**

3416 (s), 2320 (vw), 2302 (w), 2036 (s), 1930 (s), 1695 (s), 1628 (s), 1510 (m), 1449 (m), 1382 (w), 1230 (w), 1119 (m), 1084 (m), 776 (m), 628 (m).

· **[Re(CO)<sub>3</sub>(FDUHzPic)(CH<sub>3</sub>CN)]ClO<sub>4</sub>·4H<sub>2</sub>O (2b)**

3422 (b), 2324 (vw), 2296 (w), 2040 (s), 1930 (s), 1709 (m), 1651 (s), 1590 (m), 1537 (m), 1108 (s), 1090 (s), 772 (m), 752 (m), 625 (m).

· **[Re(DAAUPic)(CO)<sub>3</sub>py]ClO<sub>4</sub> (3a)**

3413 (m), 2935 (w), 2029 (s), 1913 (s), 1693 (s), 1637 (s), 1608 (m), 1587 (m), 1530 (s), 1447 (m), 1287 (w), 1090 (s), 760 (m), 703 (m), 625 (m).

· **[Re(FDUHzPic)(CO)<sub>3</sub>py]ClO<sub>4</sub> (3b)**

3412 (m), 2922 (w), 2032 (s), 1914 (s), 1708 (s), 1650 (s), 1607 (m), 1536 (s), 1094 (s), 1068 (s), 764 (m), 701 (m), 623 (m).

· **[Re(CO)<sub>3</sub>(DAAUPic)py]PF<sub>6</sub>·2H<sub>2</sub>O (4a)**

3467 (m), 3218 (w), 2031 (s), 1937 (s), 1918 (s), 1697 (m), 1628 (m), 1602 (m), 1512 (s), 1449 (m), 1288 (w), 1069 (w), 844 (s), 762 (m), 703 (m), 559 (m).

· **[Re(CO)<sub>3</sub>(FDUHzPic)py]PF<sub>6</sub> (4b)**

3441 (m), 2034 (s), 1942 (s), 1918 (s), 1708 (m), 1649 (s), 1588 (m), 1538 (m), 1450 (m), 1281 (w), 843 (s), 775 (w), 753 (w), 558 (m).

· **[Re<sub>2</sub>Cl<sub>2</sub>(CO)<sub>6</sub>(FDUHzPic)] (5b)**

3468 (m), 3318 (m), 2121 (m), 2026 (s), 2000 (m), 1932 (s), 1911 (s), 1709 (m), 1661 (m), 1615 (s), 1543 (s), 1451 (m), 769 (w), 752 (w).

· **[Re<sub>2</sub>Cl(CO)<sub>6</sub>(FDUH<sub>2</sub>PicH<sub>-1</sub>)(H<sub>2</sub>O)]·2DMSO (6b)**

3462 (m), 2028 (s), 1979 (m), 1928 (s), 1910 (s), 1880 (s), 1714 (m), 1662 (s), 1630 (m), 1541 (m), 1450 (m), 772 (w).

· **[Re<sub>2</sub>(CO)<sub>6</sub>(FDUHzPic)(CH<sub>3</sub>CN)<sub>2</sub>](ClO<sub>4</sub>)<sub>2</sub>·2H<sub>2</sub>O (7b)**

3415 (m), 3003 (w), 2937 (w), 2327 (vw), 2298 (w), 2061 (s), 2040 (m), 1953 (s), 1931 (s), 1922 (s), 1709 (m), 1647 (m), 1590 (w), 1538 (m), 1455 (m), 1091 (s), 1031 (m), 769 (w), 752 (w), 625 (m).

**NMR data (DMSO-d<sub>6</sub>, δ, ppm):**

· **DAAUPic**

<sup>13</sup>C NMR: 157.14 (C6), 156.86 (C2F), 153.98 (C4), 149.72 (C2), 149.15 (C51), 148.80 (C6F), 136.35 (C5F), 123.32 (C4F), 119.96 (C3F), 98.76 (C5), 30.38 (C3), 27.09 (C1). <sup>1</sup>H NMR: 9.69 (s, 1H, H51), 8.55 (d, 1H, H6F), 8.40 (d, 1H, H3F), 7.80 (t, 1H, H5F), 7.47 (s, 2H, N6-H<sub>2</sub>), 7.31 (t, 1H, H4F), 3.40 (s, 3H, N3-CH<sub>3</sub>), 3.17 (s, 3H, N1-CH<sub>3</sub>).

· **FDUHzPic · H<sub>2</sub>O**

<sup>13</sup>C NMR: 161.34 (C51), 161.15 (C6), 158.02 (C52), 154.92 (C4), 153.09 (C2F), 150.23 (C6F), 149.73 (C2), 136.91 (C5F), 124.85 (C4F), 120.93 (C3F), 83.39 (C5), 29.59 (C3), 27.66 (C1). <sup>1</sup>H NMR: 10.02 (s, 1H, N6-H<sub>2</sub>), 8.92 (s, 1H, H51), 8.65 (d, 1H, H6F), 8.54 (s, 1H, H52), 8.43 (s, 1H, N6-H<sub>2</sub>), 8.06 (d, 1H, H3F), 7.88 (t, 1H, H5F), 7.44 (t, 1H, H4F), 3.36 (s, 3H, N3-CH<sub>3</sub>), 3.17 (s, 3H, N1-CH<sub>3</sub>).

· **[ReCl(CO)<sub>3</sub>(DAAUPic)] · ½C<sub>7</sub>H<sub>8</sub> (1a)**

<sup>13</sup>C NMR: 196.74, 196.66, 187.50 (CO), 174.52 (C51), 155.58 (C6), 154.34 (C4), 153.18 (C6F), 149.61 (C2), 148.74 (C2F), 140.73 (C5F), 137.31 (Ci-T), 129.78 (C4F), 129.77 (C3F), 128.86 (CH-T(o)), 128.16 (CH-T(m)), 125.02 (CH-T(p)), 105.90 (C5), 30.11 (C3), 28.16 (C1), 21.00 (CH<sub>3</sub>-T). <sup>1</sup>H NMR: 9.33 (s, 1H, H51), 9.05 (d, 1H, H6F), 8.35 (d, 1H, H3F), 8.30 (t, 1H, H5F), 7.85 (t, 1H, H4F), 7.52 (s, 2H, N6-H<sub>2</sub>), 7.25 (m, CH-T(m)), 7.15 (m, CH-T(o/p)), 3.38 (s, 3H, N3-CH<sub>3</sub>), 3.23 (s, 3H, N1-CH<sub>3</sub>), 2.29 (s, 3H, CH<sub>3</sub>-T).

· **[ReCl(CO)<sub>3</sub>(FDUHzPic)] · 2H<sub>2</sub>O (1b)**

<sup>13</sup>C NMR: 188.3, 187.63, 187.01 (CO), 162.53 (C52), 161.33 (C51), 160.91 (C6), 155.40 (C4), 154.26 (C2F), 153.10 (C6F), 150.09 (C2), 140.35 (C5F), 128.84 (C4F), 128.57 (C3F), 83.40 (C5), 29.91 (C3), 27.77 (C1). <sup>1</sup>H NMR: 9.50 (s, 1H, N6-H<sub>2</sub>), 9.38 (s, 1H, H52), 9.25 (s, 1H, H51), 9.02 (d, 1H, H6F), 8.73 (s, 1H, N6-H<sub>2</sub>), 8.29 (t, 1H, H5F), 8.20 (d, 1H, H3F), 7.74 (t, 1H, H4F), 3.40 (s, 3H, N3-CH<sub>3</sub>), 3.20 (s, 3H, N1-CH<sub>3</sub>).

· **[Re(CO)<sub>3</sub>(DAAUPic)(CH<sub>3</sub>CN)]ClO<sub>4</sub> · 2H<sub>2</sub>O (2a)**

<sup>13</sup>C NMR: 196.10, 196.02, 189.50 (CO), 175.32 (C51), 156.04 (C6), 155.72 (C4), 153.36 (C6F), 149.77 (C2F), 148.68 (C2), 141.46 (C5F), 130.27 (C4F), 129.46 (C3F), 118.02 (CN-(CH<sub>3</sub>)), 105.34 (C5), 30.25 (C3), 28.07 (C1), 1.07 (CH<sub>3</sub>-(CN)). <sup>1</sup>H NMR: 9.38 (s, 1H, H51), 9.15 (d, 1H, H6F), 9.12 (d, 1H, H3F), 8.43 (m, 1H, H5F), 7.88 (m, 1H, H4F), 7.25 (s, 2H, N6-H<sub>2</sub>), 3.41 (s, 3H, N3-CH<sub>3</sub>), 3.23 (s, 3H, N1-CH<sub>3</sub>), 2.06 (s, 3H, CH<sub>3</sub>-CN).

· **[Re(CO)<sub>3</sub>(FDUHzPic)(CH<sub>3</sub>CN)]ClO<sub>4</sub> · 4H<sub>2</sub>O (2b)**

<sup>13</sup>C NMR: 190.92, 189.57, 189.15 (CO), 164.20 (C52), 160.98 (C51), 159.88 (C6), 155.47 (C4), 154.19 (C2F), 153.83 (C6F), 150.03 (C2), 141.69 (C5F), 129.40 (C4F), 129.18 (C3F), 118.06 (CN-(CH<sub>3</sub>)), 83.38 (C5), 29.98 (C3), 27.82 (C1), 1.12 (CH<sub>3</sub>-(CN)). <sup>1</sup>H NMR: 9.46 (s, 1H, H52), 9.39 (s, 1H, N6-H<sub>2</sub>), 9.22 (s, 1H, H51), 9.15 (d, 1H, H6F), 8.78 (s, 2H, N6-H<sub>2</sub>), 8.40 (t, 1H, H5F), 8.23 (d, 1H, H3F), 7.84 (t, 1H, H4F), 3.40 (s, 3H, N3-CH<sub>3</sub>), 3.20 (s, 3H, N1-CH<sub>3</sub>), 2.06 (s, 3H, CH<sub>3</sub>-CN).

· **[Re(DAAUPic)(CO)<sub>3</sub>py]ClO<sub>4</sub> (3a)**

<sup>13</sup>C NMR: 194.10, 192.22, 190.50 (CO), 174.23 (C51), 156.74 (C6), 153.17 (C6F), 152.66 (C4), 152.59 (CH(2)-py), 151.90 (C2F), 147.12 (C2), 140.46 (CH(4)-py), 141.41 (C5F), 130.67 (C4F), 127.22 (C3F), 126.79 (CH(3)-py), 105.04 (C5), 30.51 (C3), 28.62 (C1). <sup>1</sup>H NMR: 9.31 (s, 1H, H51), 9.22 (d, 1H, H6F), 9.08 (d, 1H, H3F), 8.39 (m, CH(2)-py), 8.12

(m, 1H, H5F), 7.95 (m, CH(4)-py), 7.65 (m, 1H, H4F), 7.52 (s, 2H, N6-H<sub>2</sub>), 7.39 (m, CH(3)-py), 3.44 (s, 3H, N3-CH<sub>3</sub>), 3.12 (s, 3H, N1-CH<sub>3</sub>).

· **[Re(FDUHzPic)(CO)<sub>3</sub>py]ClO<sub>4</sub> (3b)**

<sup>13</sup>C NMR: 190.72, 189.52, 189.45 (CO), 164.22 (C52), 161.36 (C51), 161.01 (C6), 155.54 (C4), 154.36 (C2F), 153.99 (C6F), 152.47 (CH(2)-py), 150.03 (C2), 141.56 (C5F), 136.51 (CH(4)-py), 129.94 (C4F), 129.59 (C3F), 127.31 (CH(3)-py), 83.77 (C5), 30.04 (C3), 27.85 (C1). <sup>1</sup>H NMR: 9.43 (s, 1H, H52), 9.32 (s, 1H, H51), 9.29 (d, 1H, H6F), 8.84 (s, 2H, N6-H<sub>2</sub>), 8.57 (m, CH(2)-py), 8.36 (t, 1H, H5F), 8.14 (d, 1H, H3F), 7.89 (m, CH(4)-py), 7.78 (t, 1H, H4F), 7.39 (m, CH(3)-py), 3.43 (s, 3H, N3-CH<sub>3</sub>), 3.22 (s, 3H, N1-CH<sub>3</sub>).

· **[Re(CO)<sub>3</sub>(DAAUPic)py]PF<sub>6</sub>·2H<sub>2</sub>O (4a)**

<sup>13</sup>C NMR: 196.23, 195.77, 190.68 (CO), 174.54 (C51), 156.38 (C6), 154.35 (C4), 152.29 (CH(2)-py), 153.19 (C6F), 149.77 (C2F), 148.74 (C2), 141.46 (C5F), 138.42 (CH(4)-py), 130.10 (C4F), 129.80 (C3F), 126.50 (CH(3)-py), 105.37 (C5), 30.25 (C3), 28.16 (C1). <sup>1</sup>H NMR: 9.35 (s, 1H, H51), 9.15 (d, 1H, H6F), 8.52 (m, CH(2)-py), 8.40 (m, 1H, H3F), 8.18 (m, 1H, H5F), 7.85 (m, 1H, H4F), 7.95 (m, CH(4)-py), 7.55 (s, 2H, N6-H<sub>2</sub>), 7.38 (m, CH(3)-py), 3.45 (s, 3H, N3-CH<sub>3</sub>), 3.13 (s, 3H, N1-CH<sub>3</sub>).

· **[Re(CO)<sub>3</sub>(FDUHzPic)py]PF<sub>6</sub> (4b)**

<sup>13</sup>C NMR: 194.46, 192.15, 189.99 (CO), 164.24 (C52), 161.36 (C51), 161.95 (C6), 155.50 (C4), 154.33 (C6F), 153.96 (C2F), 152.44 (CH(2)-py), 149.98 (C2), 141.52 (C5F), 140.42 (CH(4)-py), 129.90 (C4F), 129.55 (C3F), 127.17 (CH(3)-py), 83.73 (C5), 30.01 (C3), 27.80 (C1). <sup>1</sup>H NMR: 9.44 (s, 1H, H52), 9.36 (s, 1H, H51), 9.24 (d, 1H, H6F), 8.84 (s, 1H, N6-H<sub>2</sub>), 8.34 (m, CH(2)-py), 8.14 (t, 1H, H5F), 8.14 (d, 1H, H3F), 8.08 (m, CH(4)-py), 7.82 (t, 1H, H4F), 7.45 (m, CH(3)-py), 3.42 (s, 3H, N3-CH<sub>3</sub>), 3.21 (s, 3H, N1-CH<sub>3</sub>).

· **[Re<sub>2</sub>Cl<sub>2</sub>(CO)<sub>6</sub>(FDUHzPic)] (5b)**

<sup>13</sup>C NMR: 195.10, 193.82, 189.57 (CO), 162.53 (C52), 161.32 (C51), 160.90 (C6), 155.40 (C4), 154.23 (C2F), 153.09 (C6F), 150.08 (C2), 140.34 (C5F), 128.83 (C4F), 128.55 (C3F), 83.39 (C5), 29.90 (C3), 27.76 (C1). <sup>1</sup>H NMR: 9.50 (s, 1H, N6-H<sub>2</sub>), 9.38 (s, 1H, H52), 9.25 (s, 1H, H51), 9.01 (d, 1H, H6F), 8.73 (s, 2H, N6-H<sub>2</sub>), 8.29 (t, 1H, H5F), 8.20 (d, 1H, H3F), 7.74 (t, 1H, H4F), 3.40 (s, 3H, N3-CH<sub>3</sub>), 3.20 (s, 3H, N1-CH<sub>3</sub>).

· **[Re<sub>2</sub>(CO)<sub>6</sub>(FDUHzPic)(CH<sub>3</sub>CN)<sub>2</sub>](ClO<sub>4</sub>)<sub>2</sub>·2H<sub>2</sub>O (7b)**

<sup>13</sup>C NMR: 192.01, 191.95, 189.56 (CO), 164.18 (C52), 160.92 (C51), 155.44 (C4), 154.18 (C2F), 153.81 (C6F), 150.01 (C2), 141.67 (C5F), 129.43 (C4F), 129.36 (C3F), 118.05 (CN-(CH<sub>3</sub>)), 83.36 (C5), 29.96 (C3), 27.78 (C1), 1.10 (CH<sub>3</sub>-(CN)). <sup>1</sup>H NMR: 9.50 (s, 1H, H52), 9.41 (s, 2H, N6-H<sub>2</sub>), 9.15 (s, 1H, H51), 9.09 (d, 1H, H6F), 8.80 (s, 2H, N6-H<sub>2</sub>), 8.40 (t, 1H, H5F), 8.28 (d, 1H, H3F), 7.85 (t, 1H, H4F), 3.41 (s, 3H, N3-CH<sub>3</sub>), 3.21 (s, 3H, N1-CH<sub>3</sub>), 2.07 (s, 3H, CH<sub>3</sub>-CN).

## MS data

### · DAAUPic

MS (m/z): 260 [L-H]<sup>+</sup>, 181 [C<sub>7</sub>H<sub>9</sub>N<sub>4</sub>O<sub>2</sub>]<sup>+</sup>, 79 [C<sub>5</sub>H<sub>5</sub>N]<sup>+</sup>.

### · FDUHzPic · H<sub>2</sub>O

MS (m/z): 287 [L+H]<sup>+</sup>, 181 [C<sub>7</sub>H<sub>9</sub>N<sub>4</sub>O<sub>2</sub>]<sup>+</sup>, 106 [C<sub>6</sub>H<sub>5</sub>N<sub>2</sub>+H]<sup>+</sup>.

### · [ReCl(CO)<sub>3</sub>(DAAUPic)] · ½C<sub>7</sub>H<sub>8</sub> (1a)

ESI-MS (m/z, CH<sub>3</sub>CN/H<sub>2</sub>O): 565 [ReCl(CO)<sub>3</sub>L]H<sup>+</sup>, 501 [Re(CO)<sub>2</sub>L]<sup>+</sup>.

### · [ReCl(CO)<sub>3</sub>(FDUHzPic)] · 2H<sub>2</sub>O (1b)

ESI-MS (m/z, CH<sub>3</sub>CN/H<sub>2</sub>O): 592 [ReCl(CO)<sub>3</sub>L]H<sup>+</sup>, 556 [Re(CO)<sub>3</sub>L]<sup>+</sup>.

### · [Re(CO)<sub>3</sub>(DAAUPic)(CH<sub>3</sub>CN)]ClO<sub>4</sub> · 2H<sub>2</sub>O (2a)

ESI-MS (m/z, CH<sub>3</sub>CN/H<sub>2</sub>O): 571 [Re(CO)<sub>3</sub>L(CH<sub>3</sub>CN)]<sup>+</sup>, 530 [Re(CO)<sub>3</sub>L]<sup>+</sup>, 502 [Re(CO)<sub>2</sub>L]<sup>+</sup>.

### · [Re(CO)<sub>3</sub>(FDUHzPic)(CH<sub>3</sub>CN)]ClO<sub>4</sub> · 4H<sub>2</sub>O (2b)

ESI-MS (m/z, CH<sub>3</sub>CN/H<sub>2</sub>O): 598 [Re(CO)<sub>3</sub>L(CH<sub>3</sub>CN)]<sup>+</sup>, 556 [Re(CO)<sub>3</sub>L]<sup>+</sup>.

### · [Re(DAAUPic)(CO)<sub>3</sub>py]ClO<sub>4</sub> (3a)

ESI-MS (m/z, CH<sub>3</sub>CN/H<sub>2</sub>O): 609 [Re(CO)<sub>3</sub>Lpy]<sup>+</sup>, 530 [Re(CO)<sub>3</sub>L]<sup>+</sup>, 502 [Re(CO)<sub>2</sub>L]<sup>+</sup>.

### · [Re(FDUHzPic)(CO)<sub>3</sub>py]ClO<sub>4</sub> (3b)

ESI-MS (m/z, CH<sub>3</sub>CN/H<sub>2</sub>O): 636 [Re(CO)<sub>3</sub>Lpy]<sup>+</sup>, 556 [Re(CO)<sub>3</sub>L]<sup>+</sup>.

### · [Re(CO)<sub>3</sub>(DAAUPic)py]PF<sub>6</sub> · 2H<sub>2</sub>O (4a)

ESI-MS (m/z, CH<sub>3</sub>CN/H<sub>2</sub>O): 609 [Re(CO)<sub>3</sub>Lpy]<sup>+</sup>, 530 [Re(CO)<sub>3</sub>L]<sup>+</sup>, 502 [Re(CO)<sub>2</sub>L]<sup>+</sup>.

### · [Re(CO)<sub>3</sub>(FDUHzPic)py]PF<sub>6</sub> (4b)

ESI-MS (m/z, CH<sub>3</sub>CN/H<sub>2</sub>O): 636 [Re(CO)<sub>3</sub>Lpy]<sup>+</sup>, 556 [Re(CO)<sub>3</sub>L]<sup>+</sup>.

### · [Re<sub>2</sub>Cl<sub>2</sub>(CO)<sub>6</sub>(FDUHzPic)] (5b).

ESI-MS (m/z, CH<sub>3</sub>CN/H<sub>2</sub>O): 904 [Re<sub>2</sub>Cl(CO)<sub>6</sub>L(CH<sub>3</sub>CN)]<sup>+</sup>, 863 [Re<sub>2</sub>Cl(CO)<sub>3</sub>L]<sup>+</sup>.

### · [Re<sub>2</sub>(CO)<sub>6</sub>(FDUHzPic)(CH<sub>3</sub>CN)<sub>2</sub>](ClO<sub>4</sub>)<sub>2</sub> · 2H<sub>2</sub>O (7b)

ESI-MS (m/z, CH<sub>3</sub>CN/H<sub>2</sub>O): 867 [Re<sub>2</sub>(CO)<sub>6</sub>L(CH<sub>3</sub>CN)]<sup>2+</sup>, 827 [Re<sub>2</sub>(CO)<sub>6</sub>L]<sup>2+</sup>, 771 [Re<sub>2</sub>(CO)<sub>4</sub>L]<sup>2+</sup>.

**Table S1**Mulliken charges for the atoms of the coordination sphere in complexes **6b**, **4b** and **1a**.

| Atom/Method                                                                                      | M06L  | $\omega$ B97XD | B3LYP |
|--------------------------------------------------------------------------------------------------|-------|----------------|-------|
| [Re <sub>2</sub> Cl(CO) <sub>6</sub> (FDUHzPicH <sub>-1</sub> )(H <sub>2</sub> O)] ( <b>6b</b> ) |       |                |       |
| Re1                                                                                              | 0.59  | 0.26           | 0.32  |
| C7X                                                                                              | 0.34  | 0.35           | 0.30  |
| C8X                                                                                              | 0.33  | 0.35           | 0.30  |
| C9X                                                                                              | 0.36  | 0.37           | 0.30  |
| N1F                                                                                              | -0.81 | -0.72          | -0.67 |
| N52                                                                                              | -0.53 | -0.50          | -0.44 |
| Cl                                                                                               | -0.57 | -0.51          | -0.54 |
| Re2                                                                                              | 0.54  | 0.27           | 0.38  |
| C7Y                                                                                              | 0.37  | 0.38           | 0.33  |
| C8Y                                                                                              | 0.31  | 0.32           | 0.26  |
| C9Y                                                                                              | 0.32  | 0.33           | 0.27  |
| O1W                                                                                              | -0.78 | -0.74          | -0.72 |
| N6                                                                                               | -0.96 | -0.87          | -0.70 |
| N51                                                                                              | -0.61 | -0.56          | -0.53 |
| Balance                                                                                          | -1.10 | -1.27          | -1.14 |
| [Re(CO) <sub>3</sub> (FDUHzPic)py] <sup>+</sup> ( <b>4b</b> )                                    |       |                |       |
| Re                                                                                               | 0.69  | 0.36           | 0.39  |
| C7X                                                                                              | 0.32  | 0.34           | 0.31  |
| C8X                                                                                              | 0.28  | 0.30           | 0.25  |
| C9X                                                                                              | 0.31  | 0.32           | 0.28  |
| N1F                                                                                              | -0.84 | -0.73          | -0.69 |
| N52                                                                                              | -0.56 | -0.50          | -0.48 |
| N1P                                                                                              | -0.78 | -0.70          | -0.66 |
| Balance                                                                                          | -0.58 | -0.61          | -0.60 |
| [ReCl(CO) <sub>3</sub> (DAAUPic)] ( <b>1a</b> )                                                  |       |                |       |
| Re                                                                                               | 0.52  |                |       |
| C7X                                                                                              | 0.33  |                |       |
| C8X                                                                                              | 0.32  |                |       |
| C9X                                                                                              | 0.33  |                |       |
| Cl                                                                                               | -0.58 |                |       |
| N1F                                                                                              | -0.99 |                |       |
| N52                                                                                              | -0.85 |                |       |
| Balance                                                                                          | -0.92 |                |       |
